# Supplementary material for: Proton Pump Inhibitors Inhibit Pancreatic Secretion: Role of Gastric and Non-Gastric H+/K+-ATPases
Source: PLOS journal article supplement (doi:10.1371/journal.pone.0126432), 2015-05-18

**Fig. 1A**

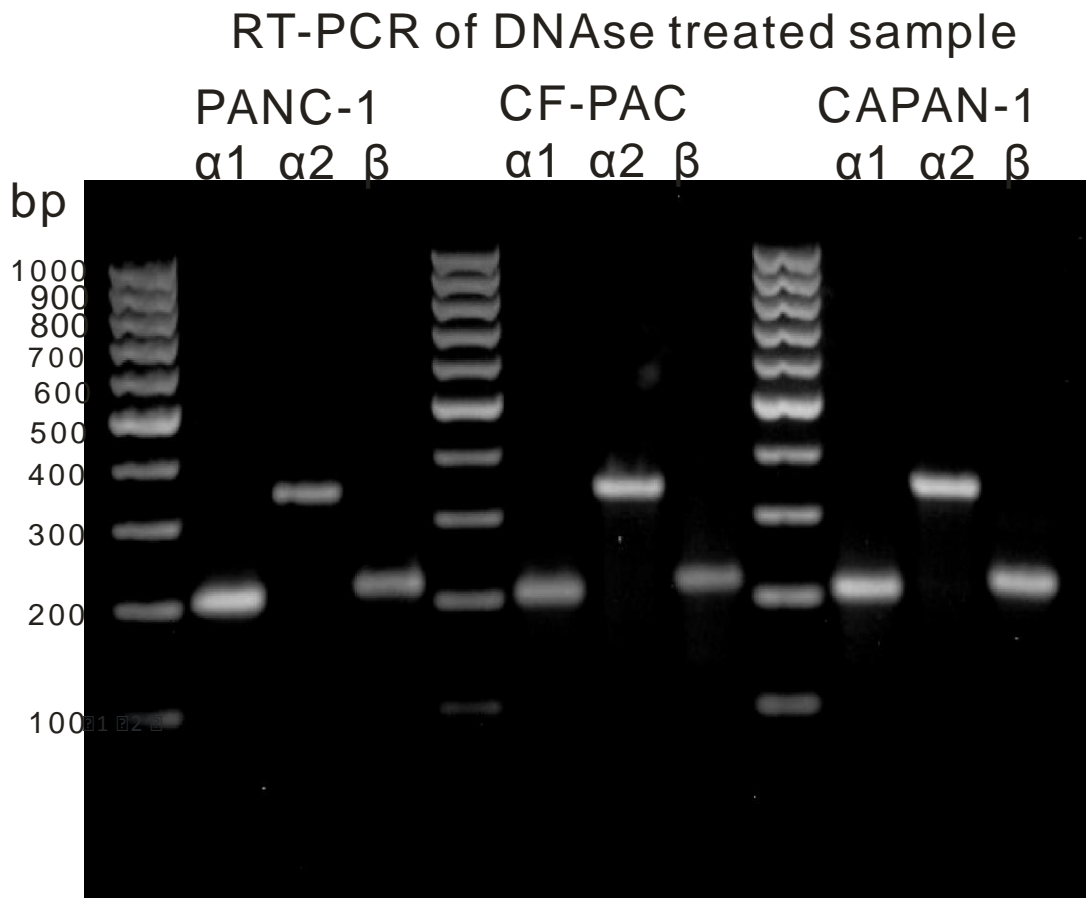

$\alpha 1$ =alpha subunit of gastric HK pump (200bp)  
 $\alpha 2$ =alpha subunit of non-gastric HK pump(339bp)  
 $\beta$ =beta subunit of gastric HK pump(213bp)

RNA template was treated with DNase  
to get rid of DNA contamination

**Fig. 1 B 3 parts**  
**HKα1**

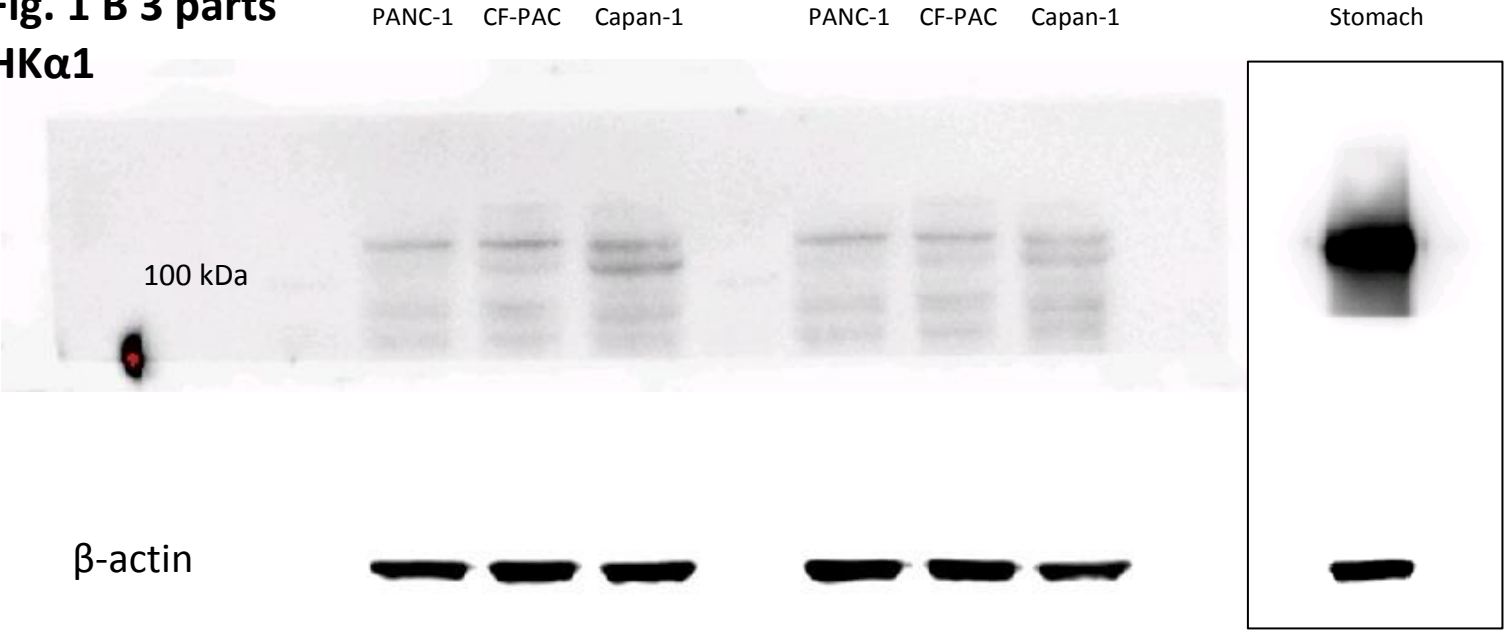

Proteins run in duplicate with actin // Stomach and colon run separately due to the different exposure time

**HKα2**

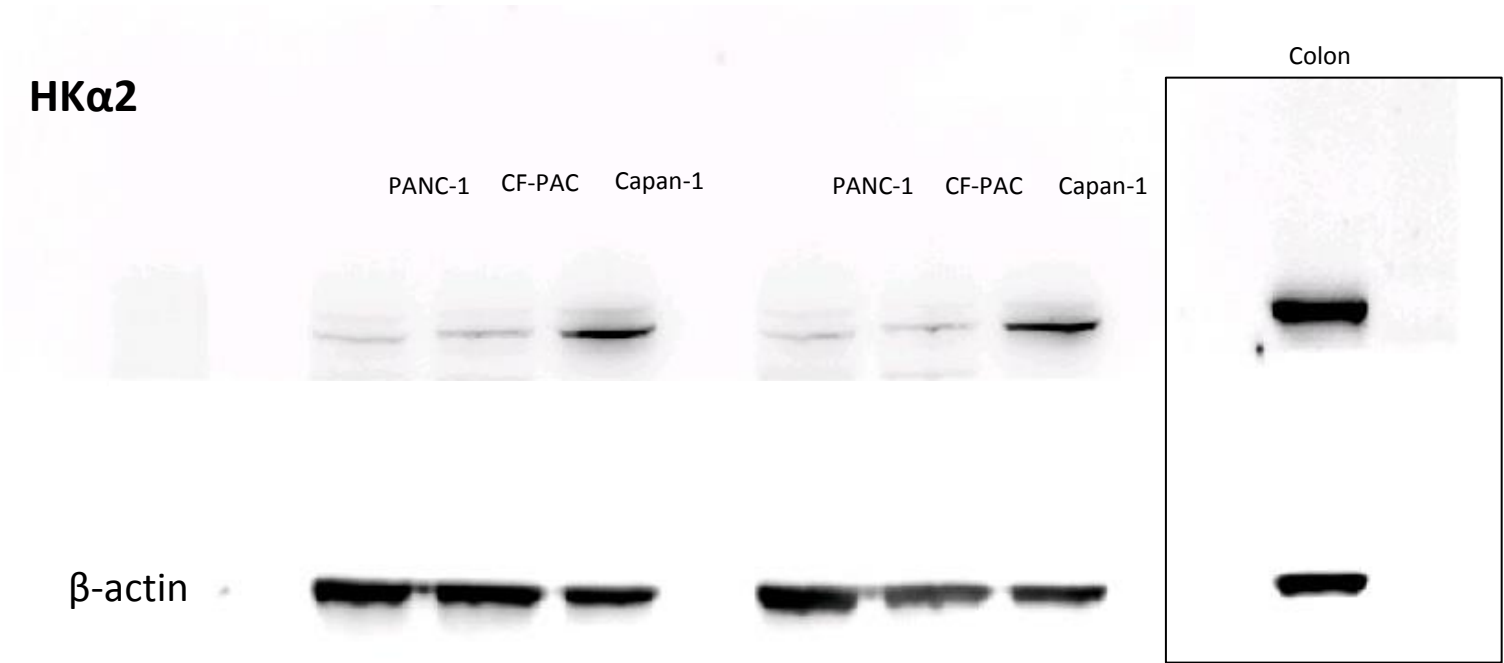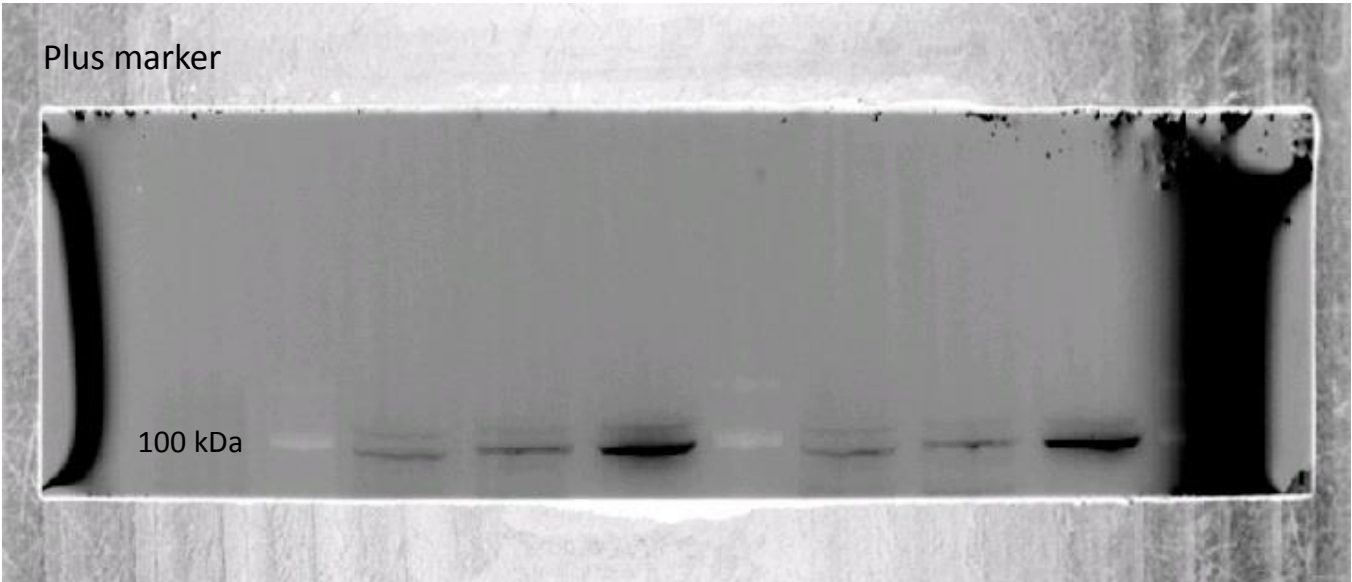

HK  $\beta$

Stomach      PANC-1    CF-PAC    Capan-1

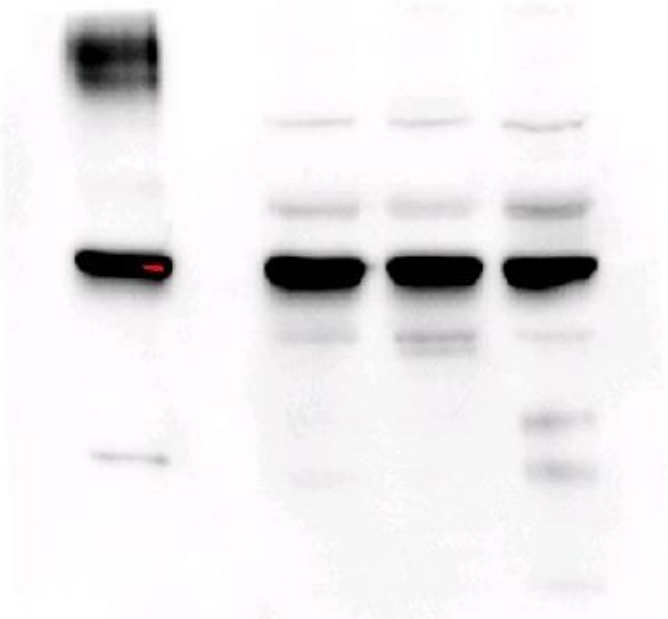

$\beta$ -actin

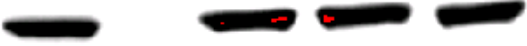

Plus marker

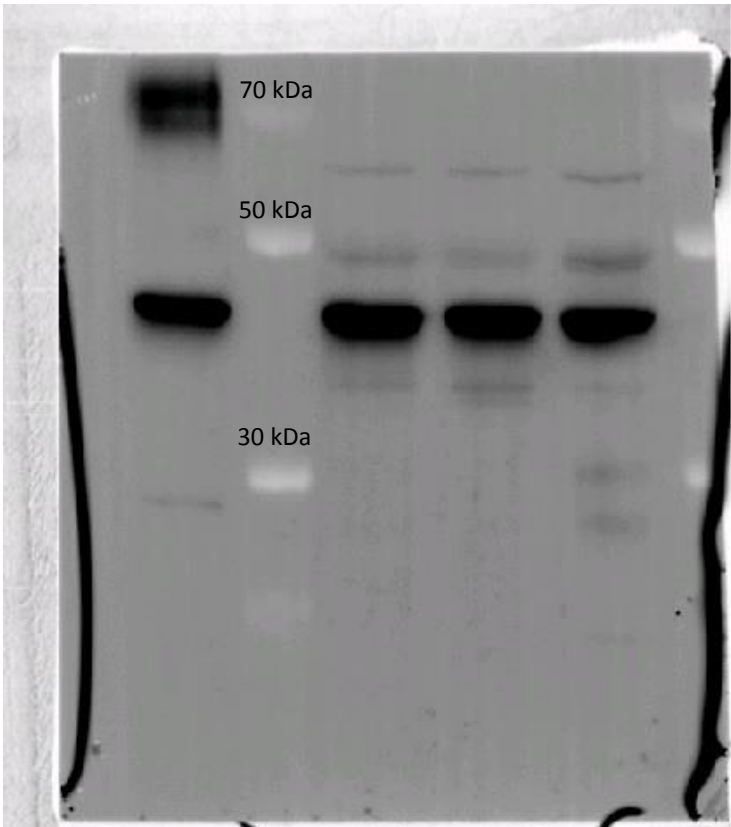

Supplement: S1 (10.1371/journal.pone.0126432.s001) [file journal.pone.0126432.s001]
